# Supplementary material for: Evaluation of the Structural Modification of Ibuprofen on the Penetration Release of Ibuprofen from a Drug-in-Adhesive Matrix Type Transdermal Patch
Source: MDPI journal article supplement (doi:10.3390/ijms23147752), 2022-07-13
Supplement: s1 [file s1]

# Supplementary data

## **Evaluation of structural modification of ibuprofen on the penetration release of ibuprofen from drug-in-adhesive matrix type transdermal patch**

Paula Ossowicz-Rupniewska<sup>a\*</sup>, Paulina Bednarczyk<sup>a</sup>, Małgorzata Nowak<sup>a</sup>, Anna Nowak<sup>b</sup>,  
Wiktoria Duchnik<sup>b</sup>, Łukasz Kucharski<sup>b</sup>, Joanna Klebeka<sup>a</sup>, Ewelina Świątek<sup>a</sup>, Karolina Bilska<sup>a</sup>,  
Zbigniew Czech<sup>a</sup>

<sup>a</sup> West Pomeranian University of Technology in Szczecin, Faculty of Chemical Technology and Engineering, Department of Chemical Organic Technology and Polymeric Materials, Piastów Avenue 42, 71-065 Szczecin, Poland

<sup>b</sup> Pomeranian Medical University in Szczecin, Department of Cosmetic and Pharmaceutical

\*Corresponding author: Paula Ossowicz-Rupniewska, e-mail: possowicz@zut.edu.pl; tel: +48914494801

---

Number of pages: 15

Number of Figures: 26

Number of Tables: 1

## **Table of Contents**

|                                                                                                                                                                               |         |
|-------------------------------------------------------------------------------------------------------------------------------------------------------------------------------|---------|
| 1. Microspectroscopy analysis of the transdermal patch                                                                                                                        | S2-S6   |
| 2. The TG curves of obtained patches                                                                                                                                          | S7-S13  |
| 3. The DSC curves of obtained patches                                                                                                                                         | S13-S19 |
| 4. The Mann-Whitney's test estimated significant differences in the cumulative mass between all analyzed compounds, taking all time points during the entire 24 h permeation. | S20     |

## Microspectroscopy analysis of the transdermal patch

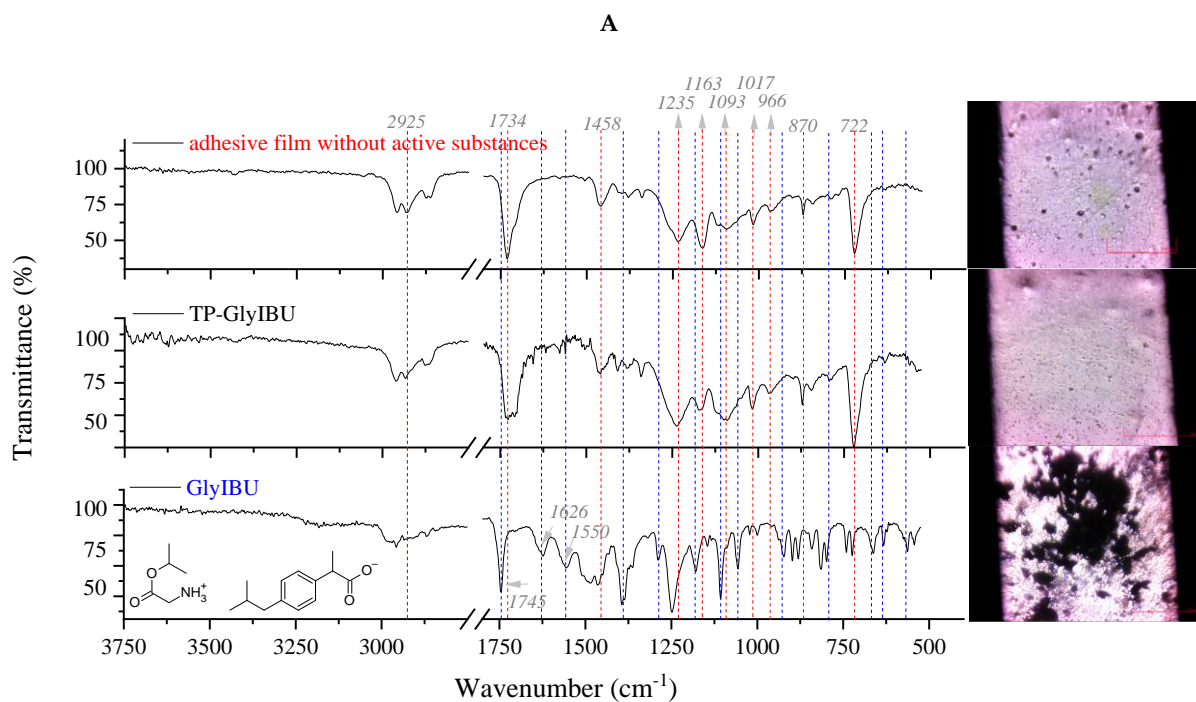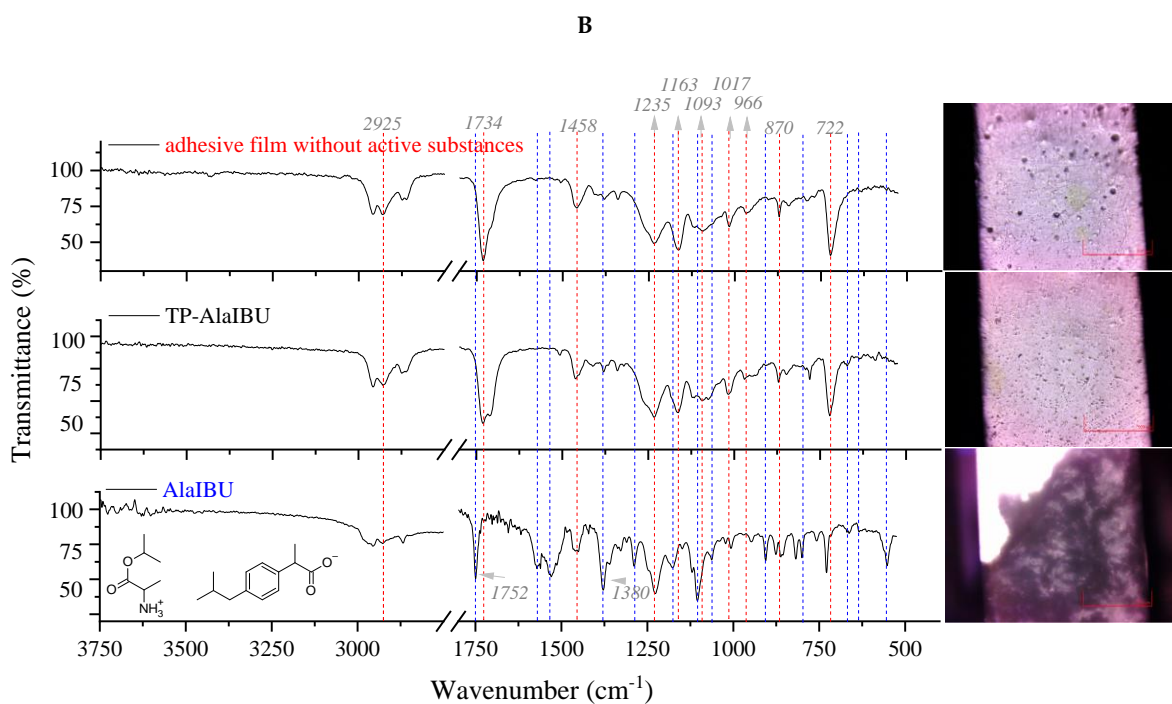

C

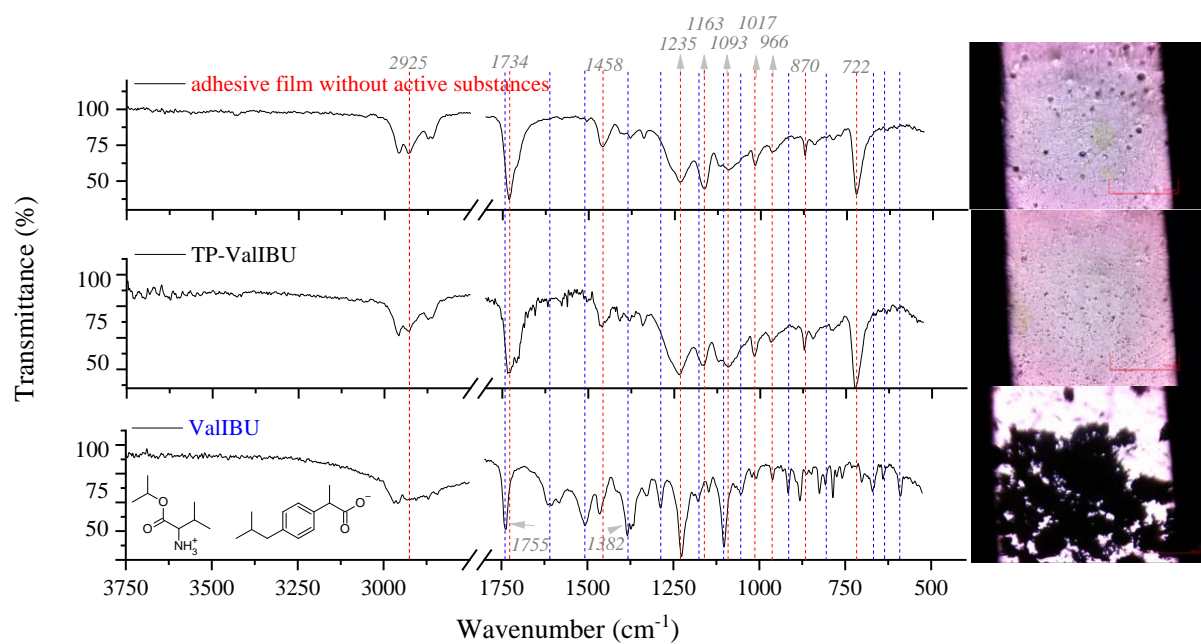

D

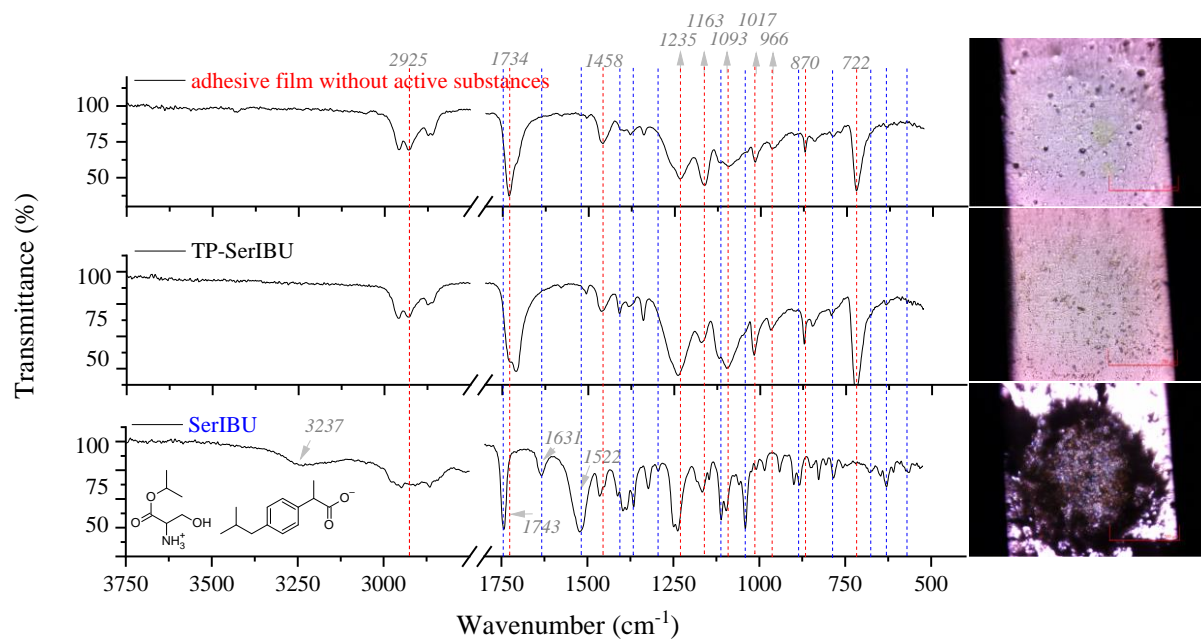

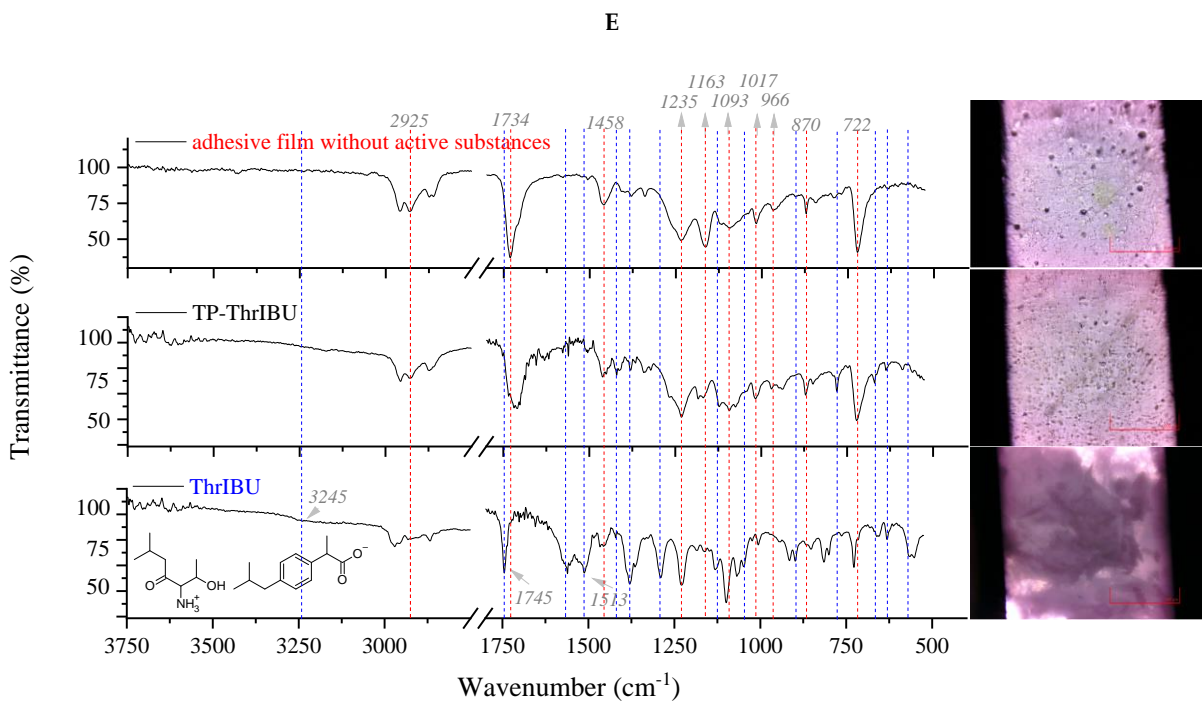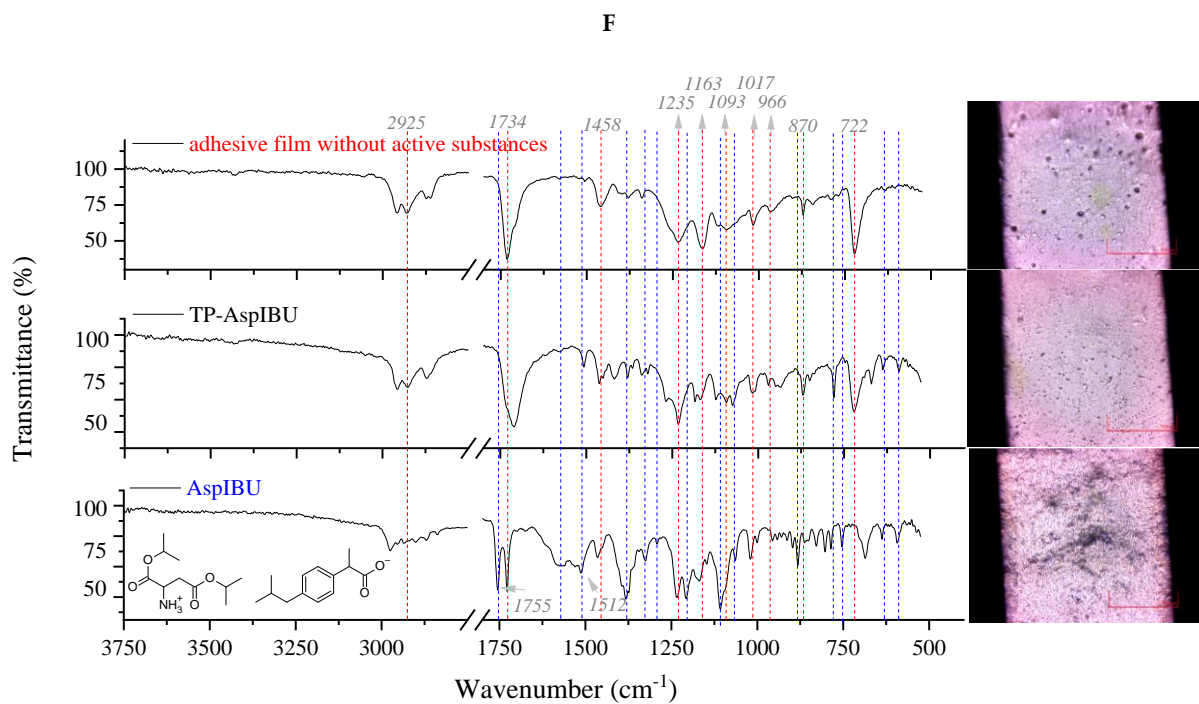

G

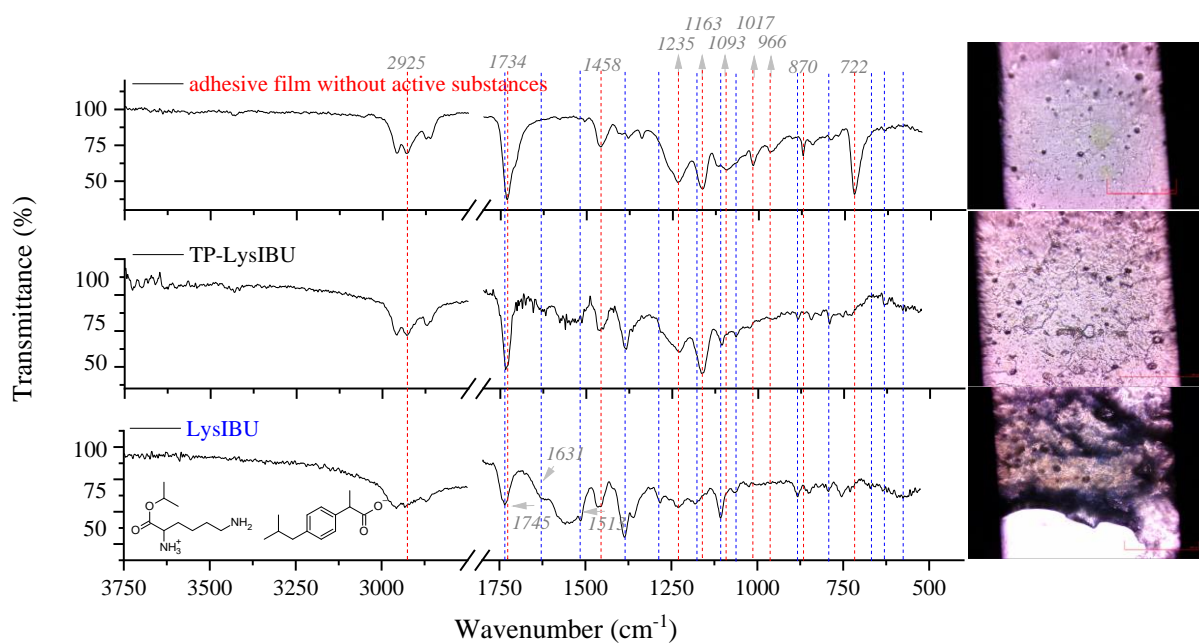

H

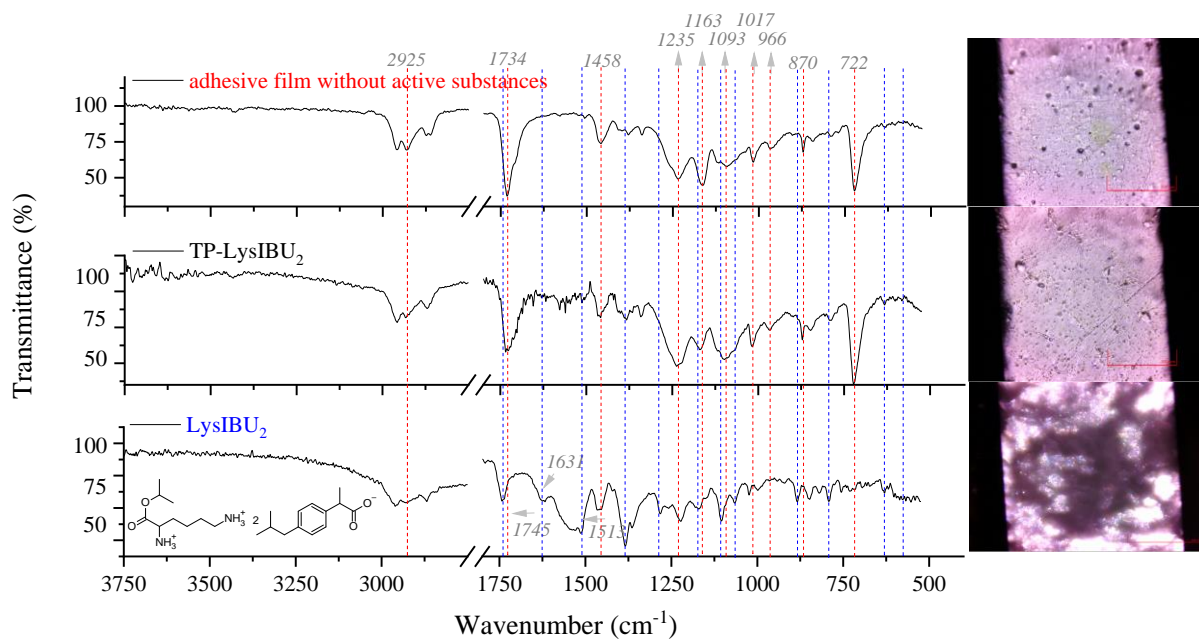

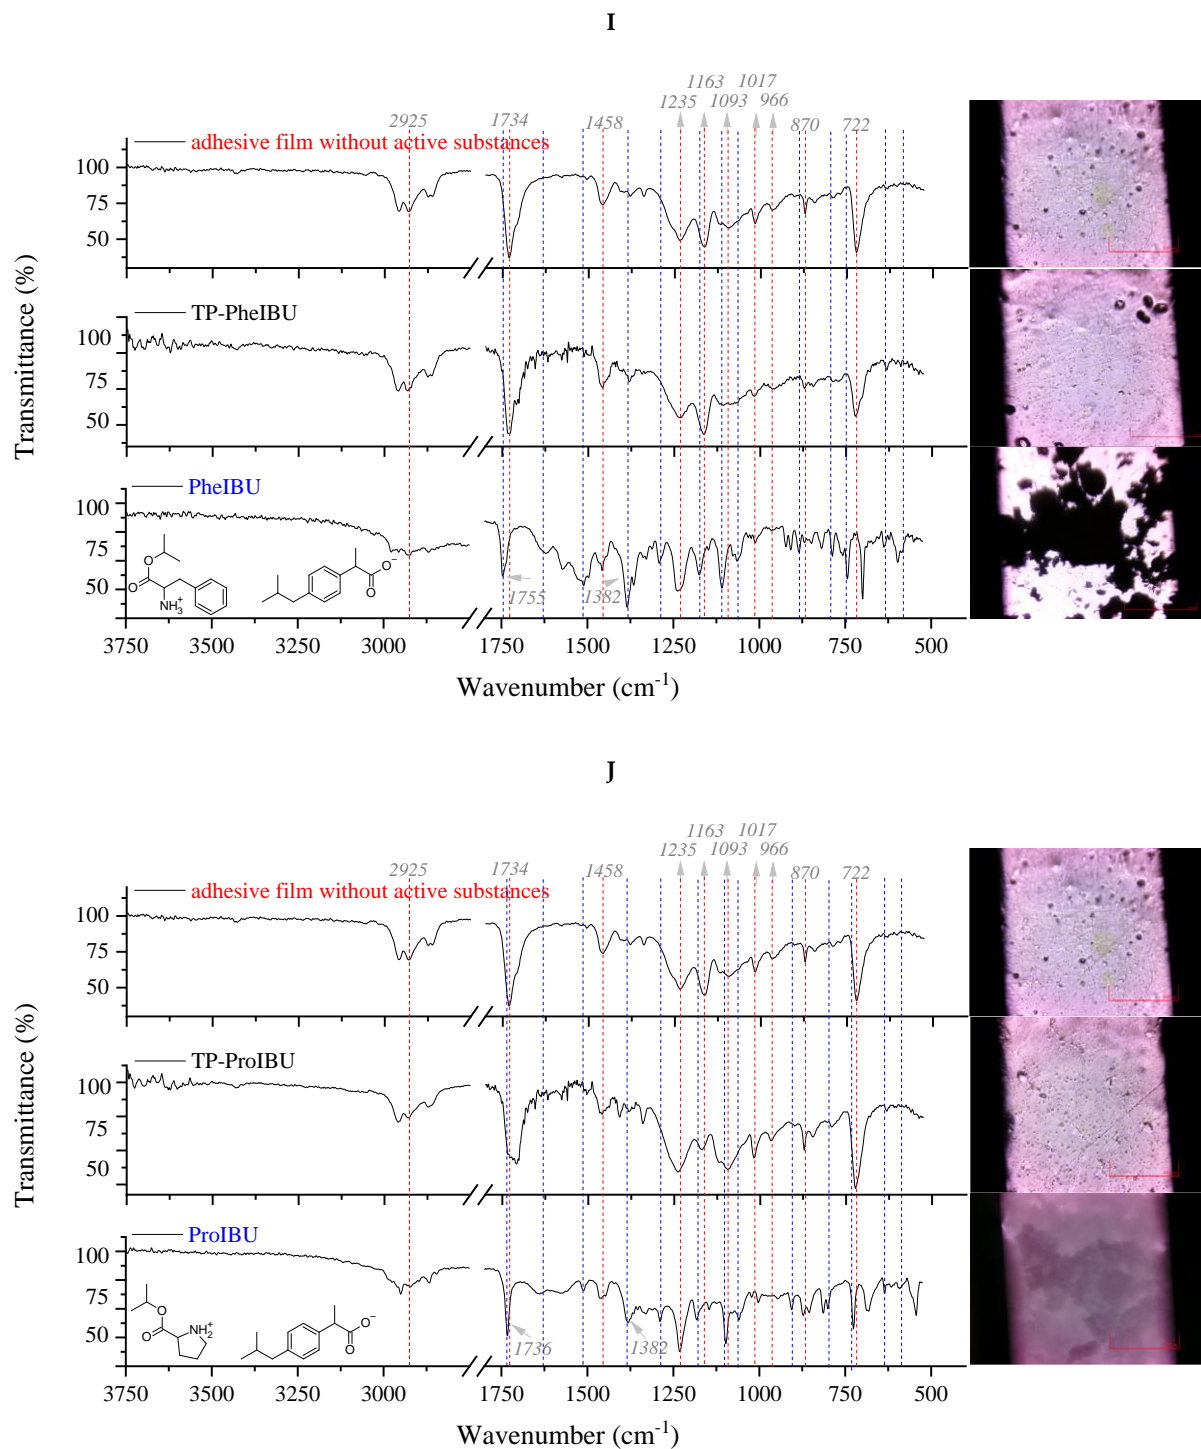

**Figure S1.** Microspectroscopy analysis of the transdermal patch (TP) – (A) with GlyIBU; (B) with AlaIBU; (C) with ValIBU; (D) with SerIBU; (E) with ThrIBU; (F) with AspIBU; (G) with LysIBU; (H) with LysIBU<sub>2</sub>; (I) with PheIBU; (J) with ProIBU.

## The TG curves of obtained patches

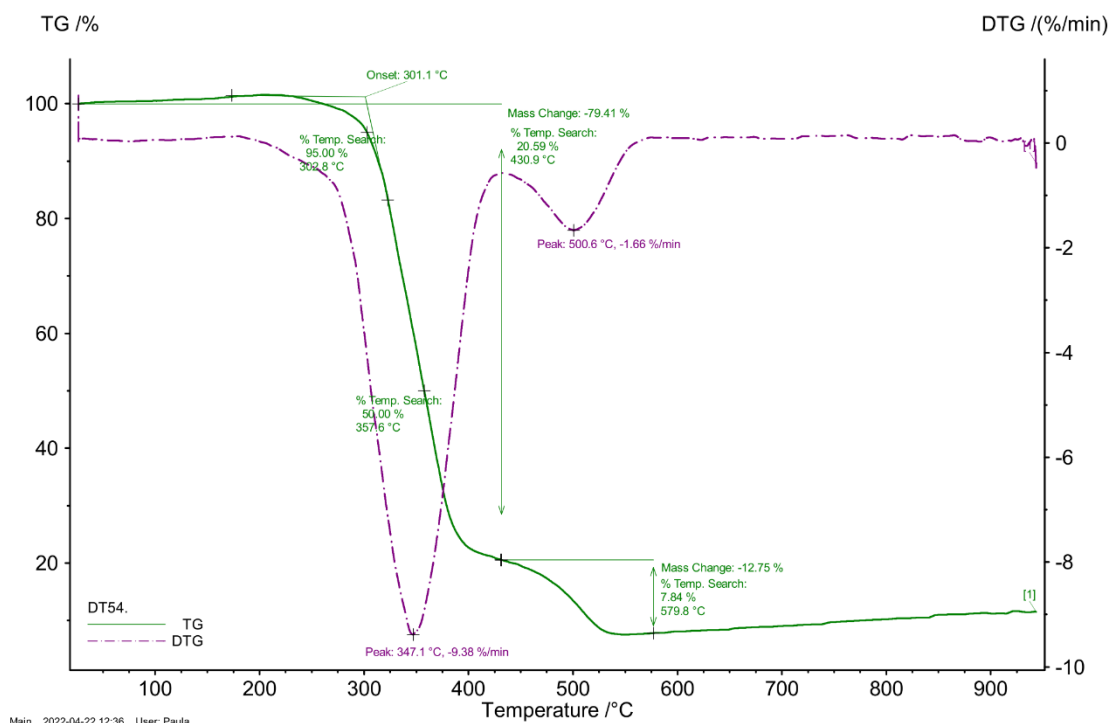

**Figure S2.** The TG and DTG curves of DT54 patch.

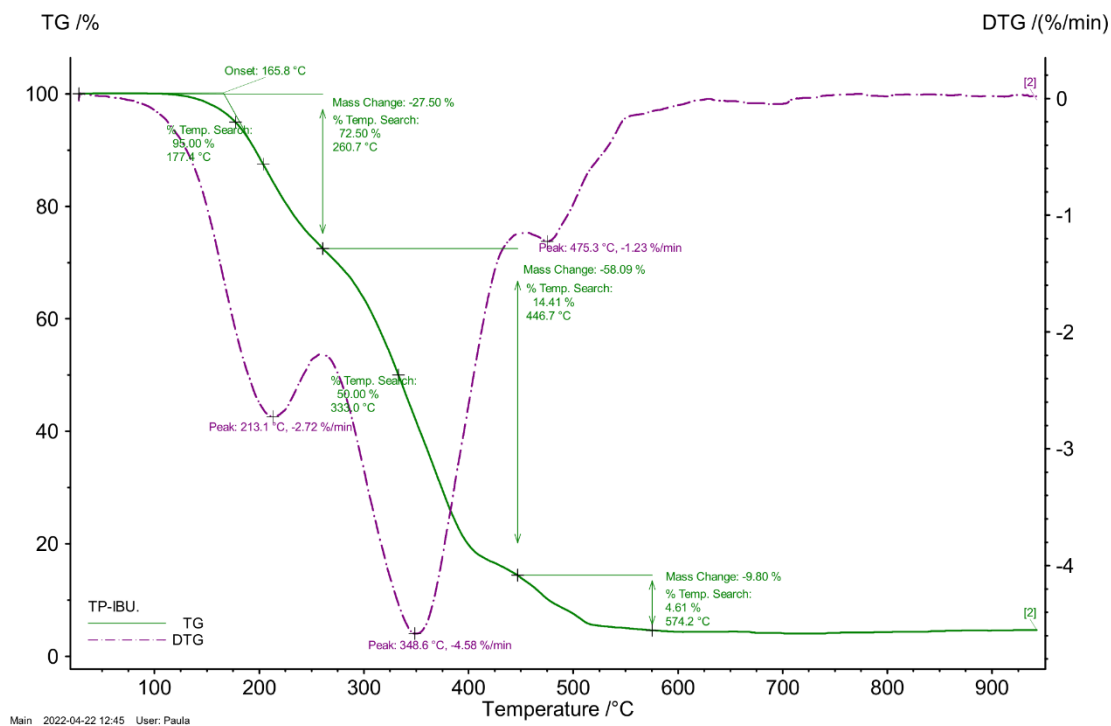

**Figure S3.** The TG and DTG curves of TP-IBU patch.



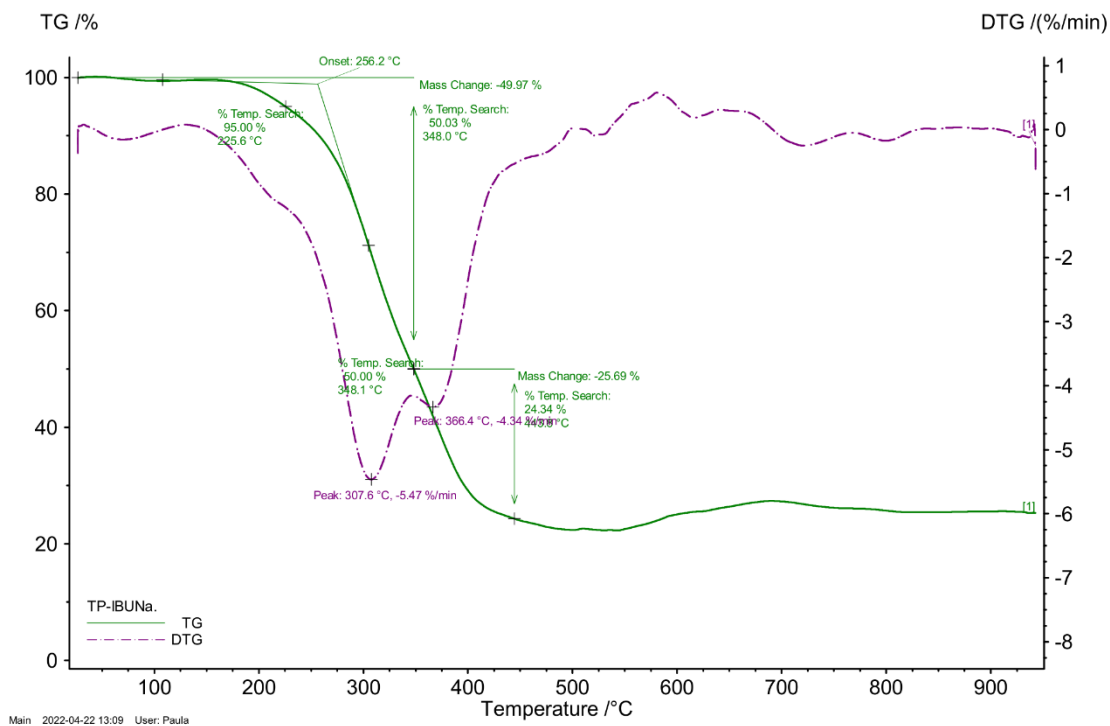

**Figure S4.** The TG and DTG curves of TP-IBUNa patch.

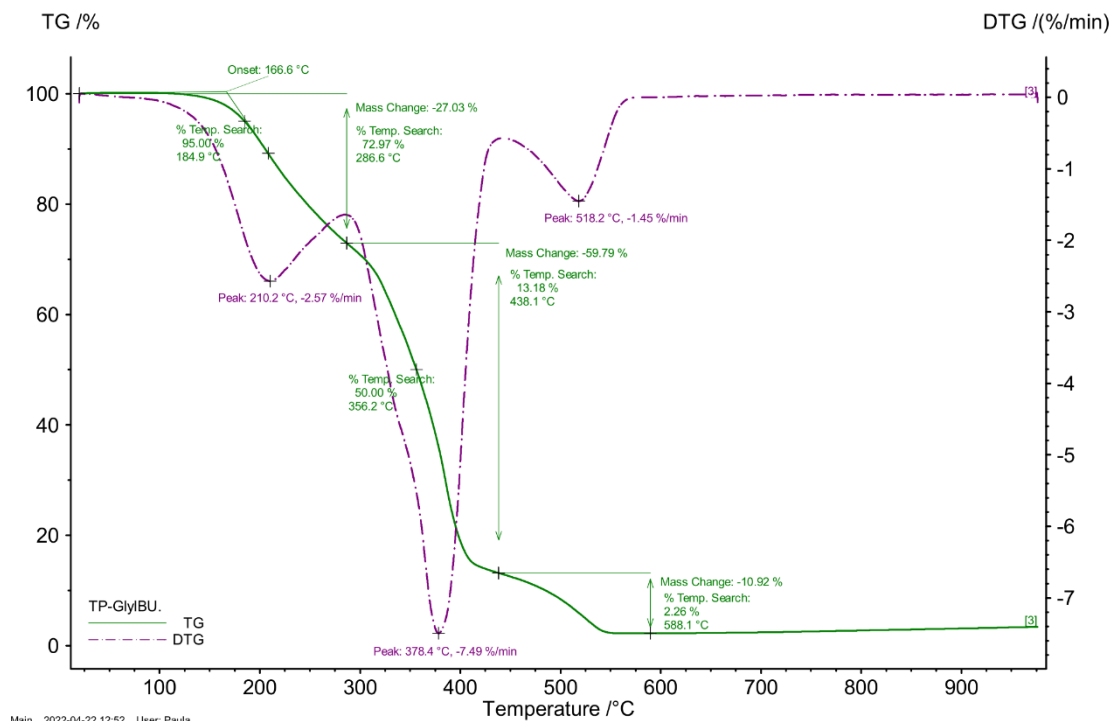

**Figure S5.** The TG and DTG curves of TP-GlyIBU patch.



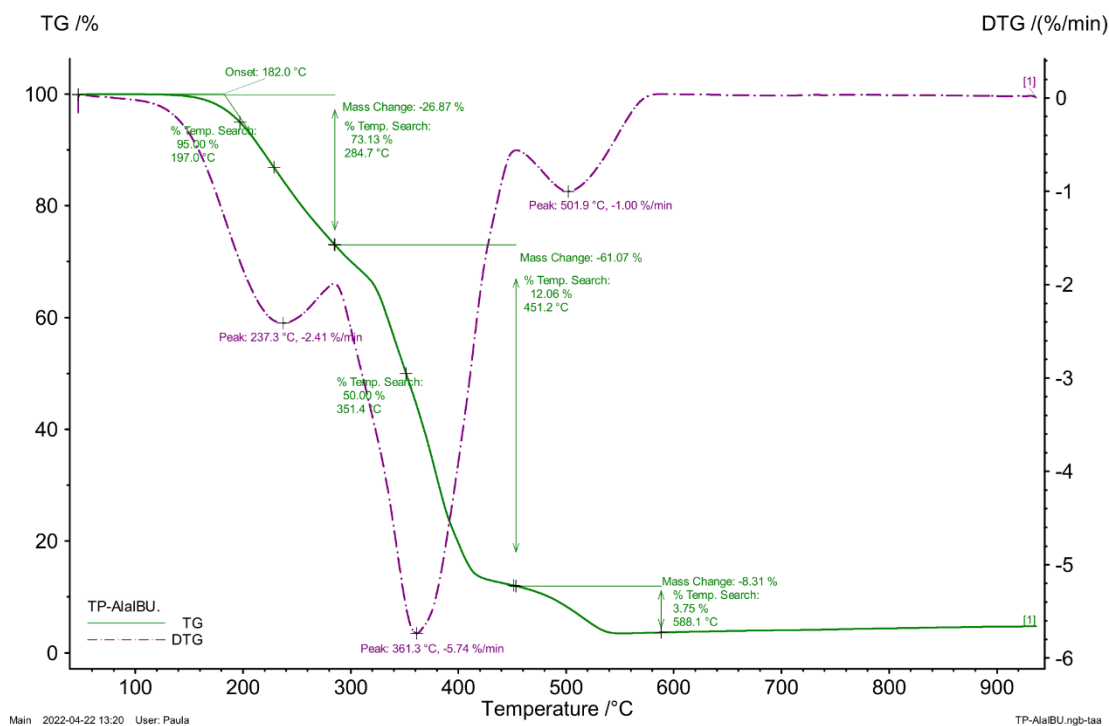

**Figure S6.** The TG and DTG curves of TP-AlalBU patch.

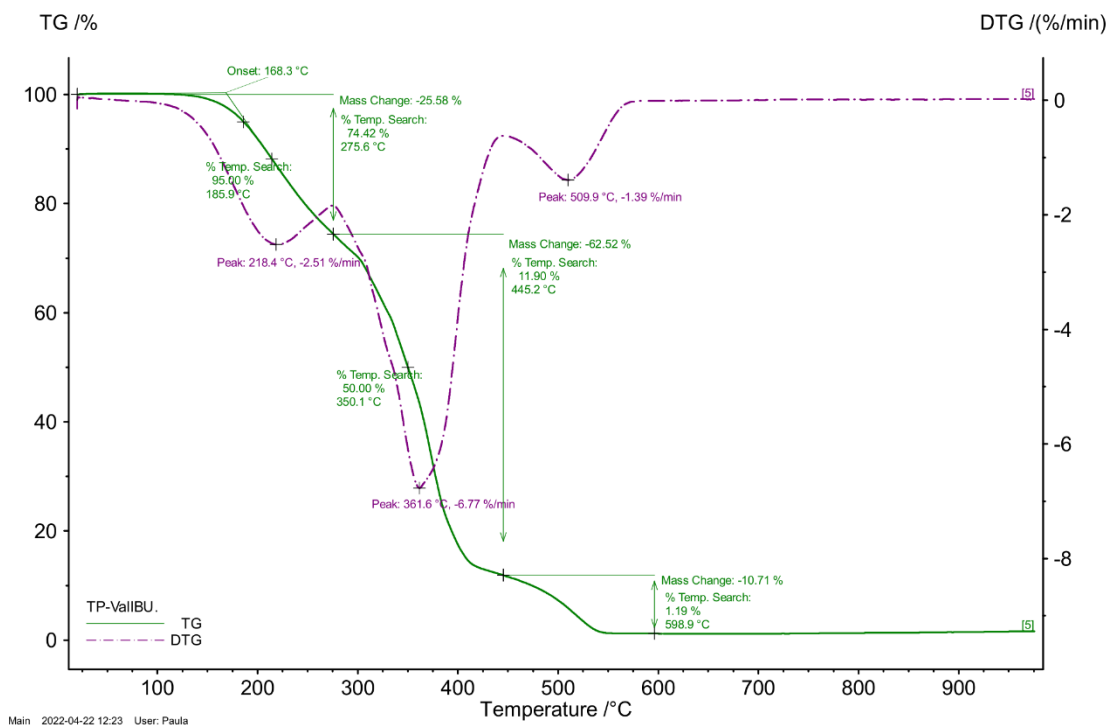

**Figure S7.** The TG and DTG curves of TP-ValIBU patch.

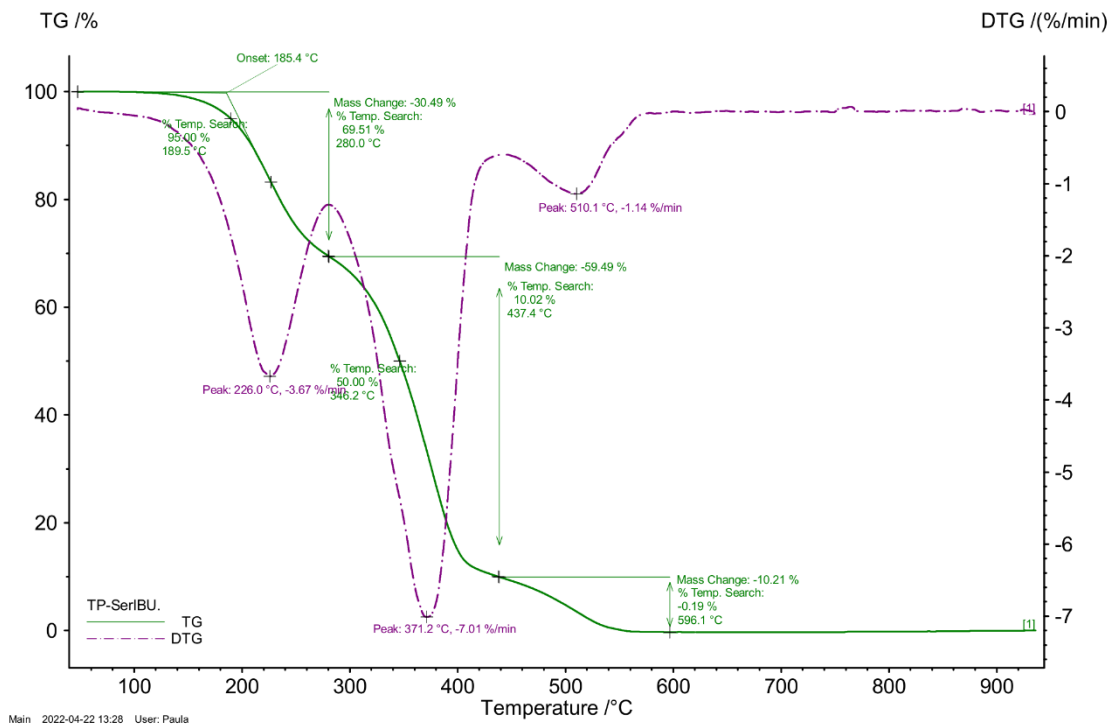

**Figure S8.** The TG and DTG curves of TP-SerIBU patch.

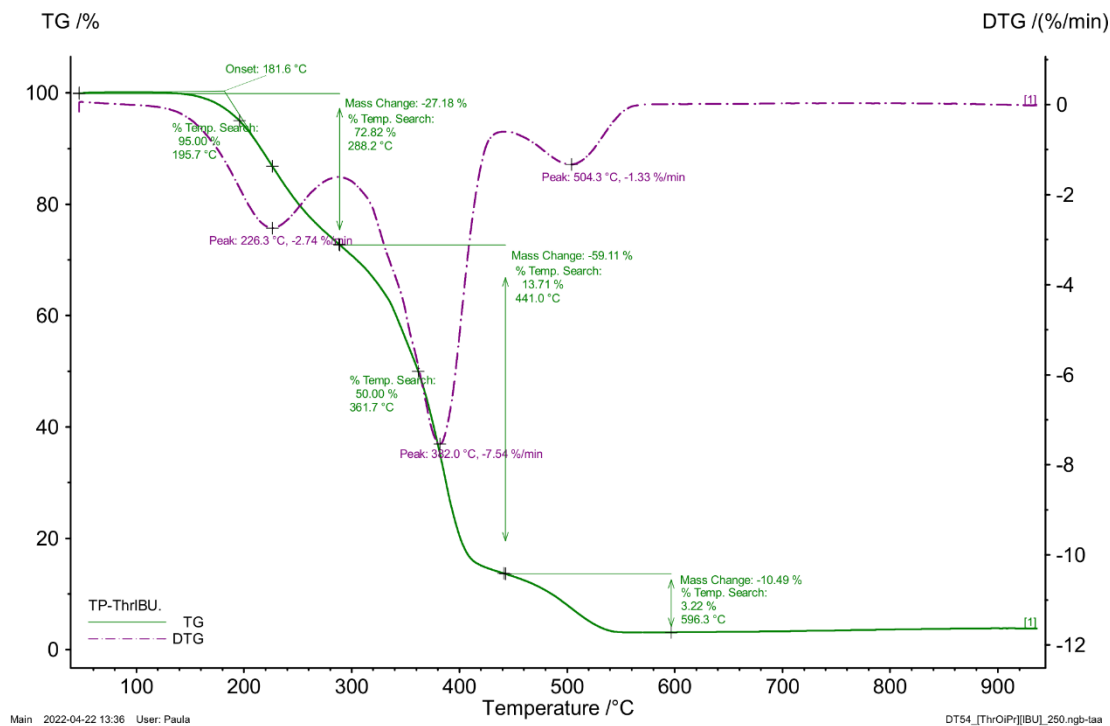

**Figure S9.** The TG and DTG curves of TP-ThrIBU patch.

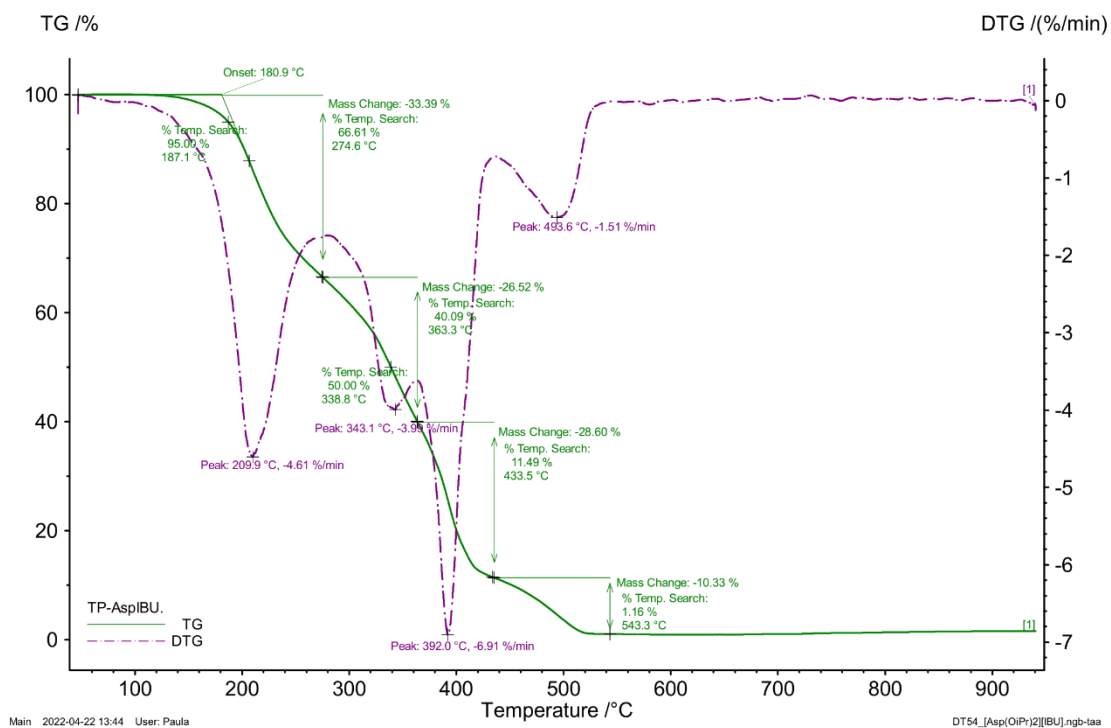

**Figure S10.** The TG and DTG curves of TP-AspIBU patch.

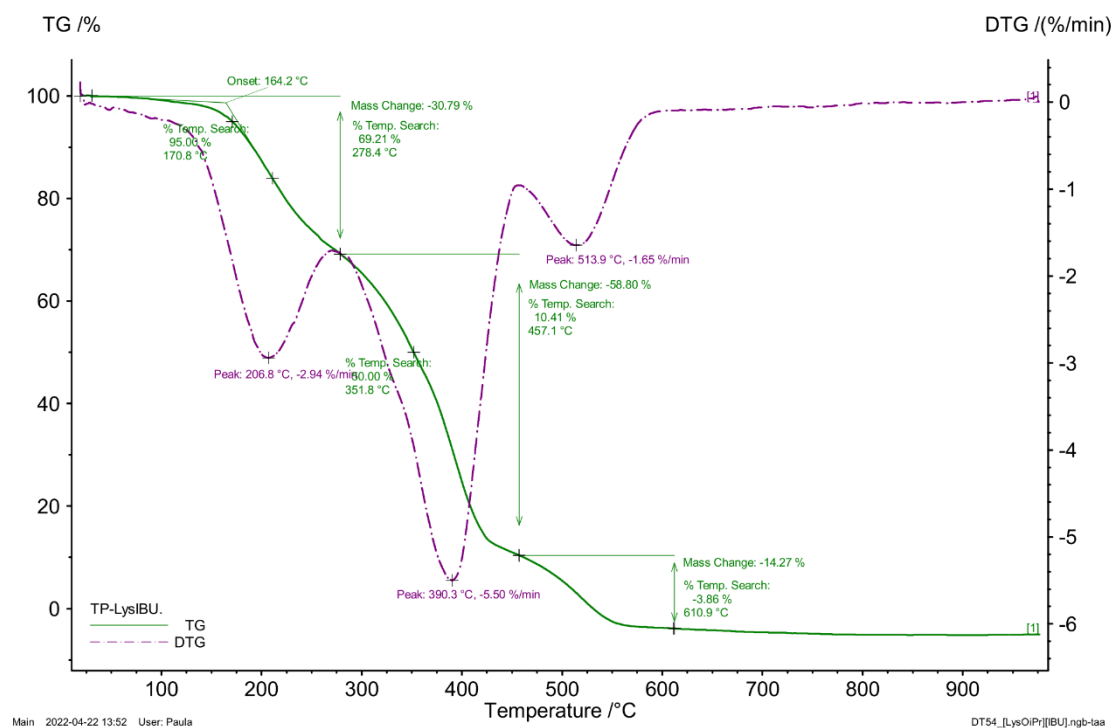

**Figure S11.** The TG and DTG curves of TP-LysIBU patch.

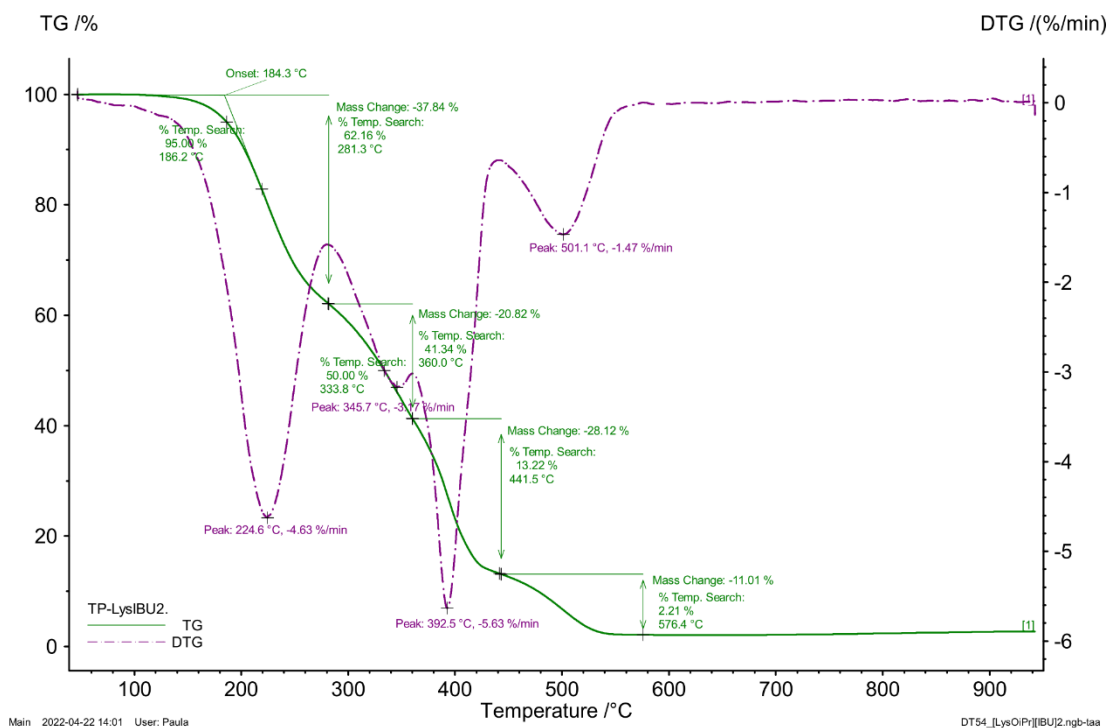

**Figure S12.** The TG and DTG curves of TP-LysIBU<sub>2</sub> patch.

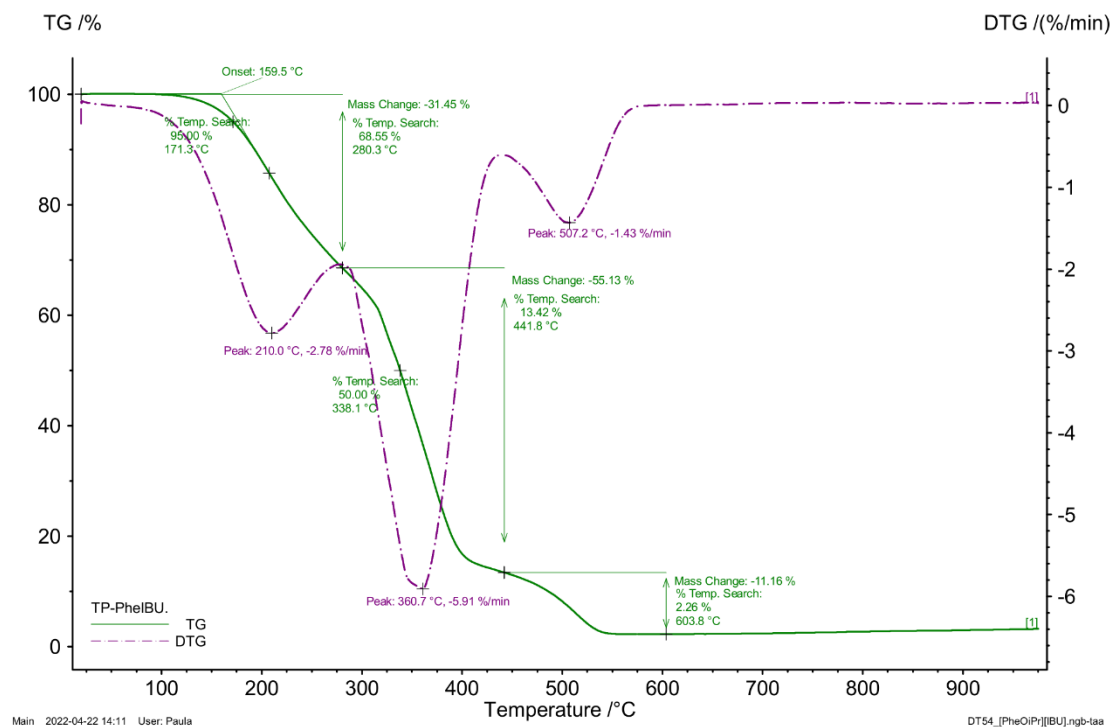

**Figure S13.** The TG and DTG curves of TP-PheIBU patch.

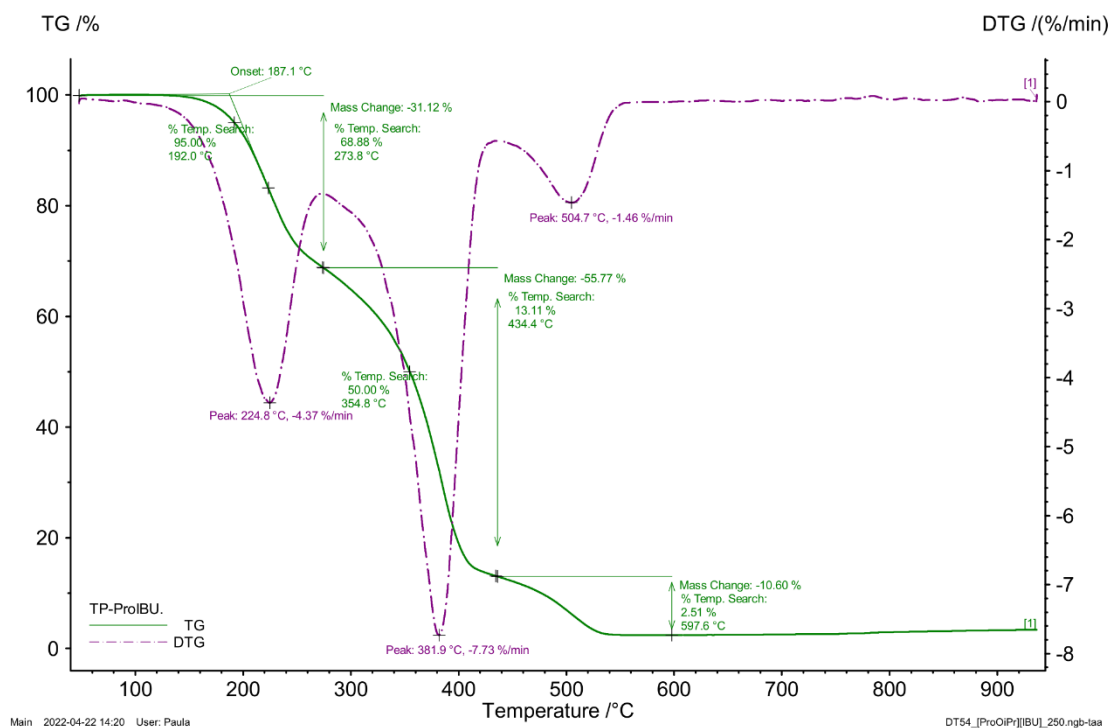

**Figure S14.** The TG and DTG curves of TP-ProIBU patch.

### The DSC curves of obtained patches

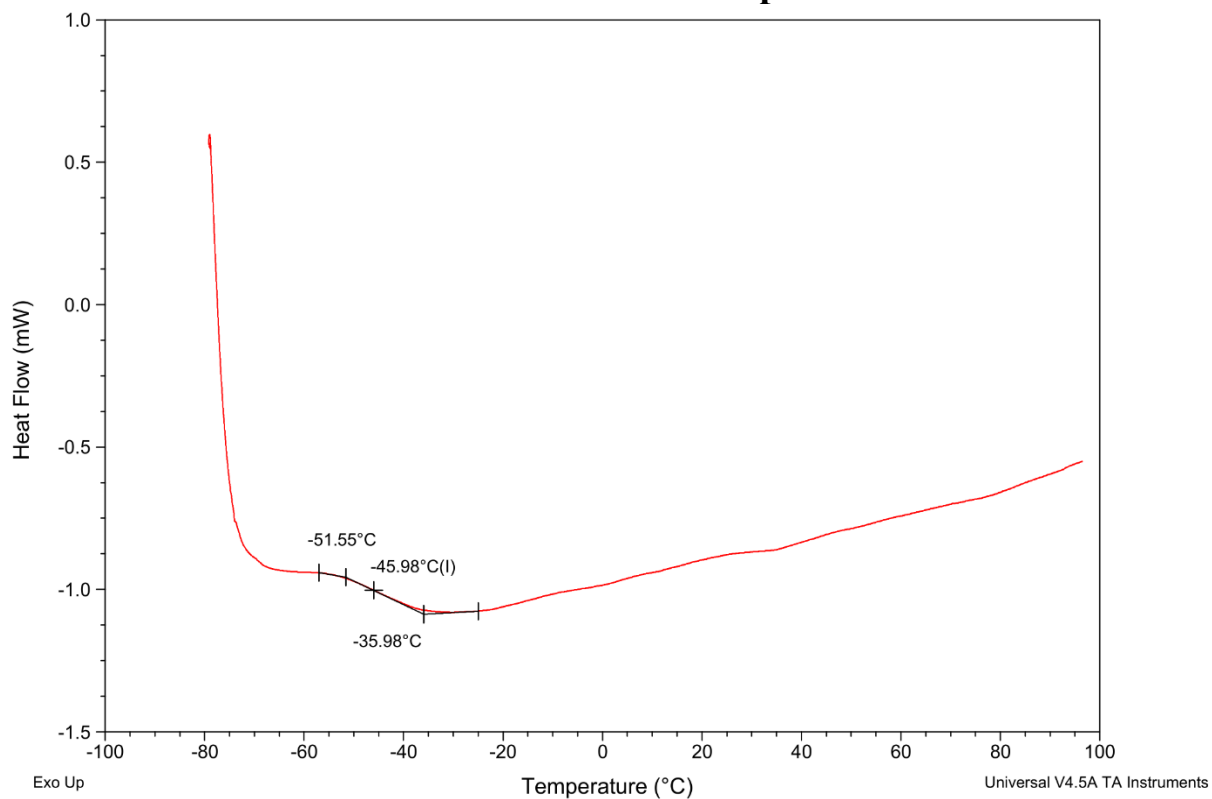

**Figure S15.** The DSC curve of DT54 patch.

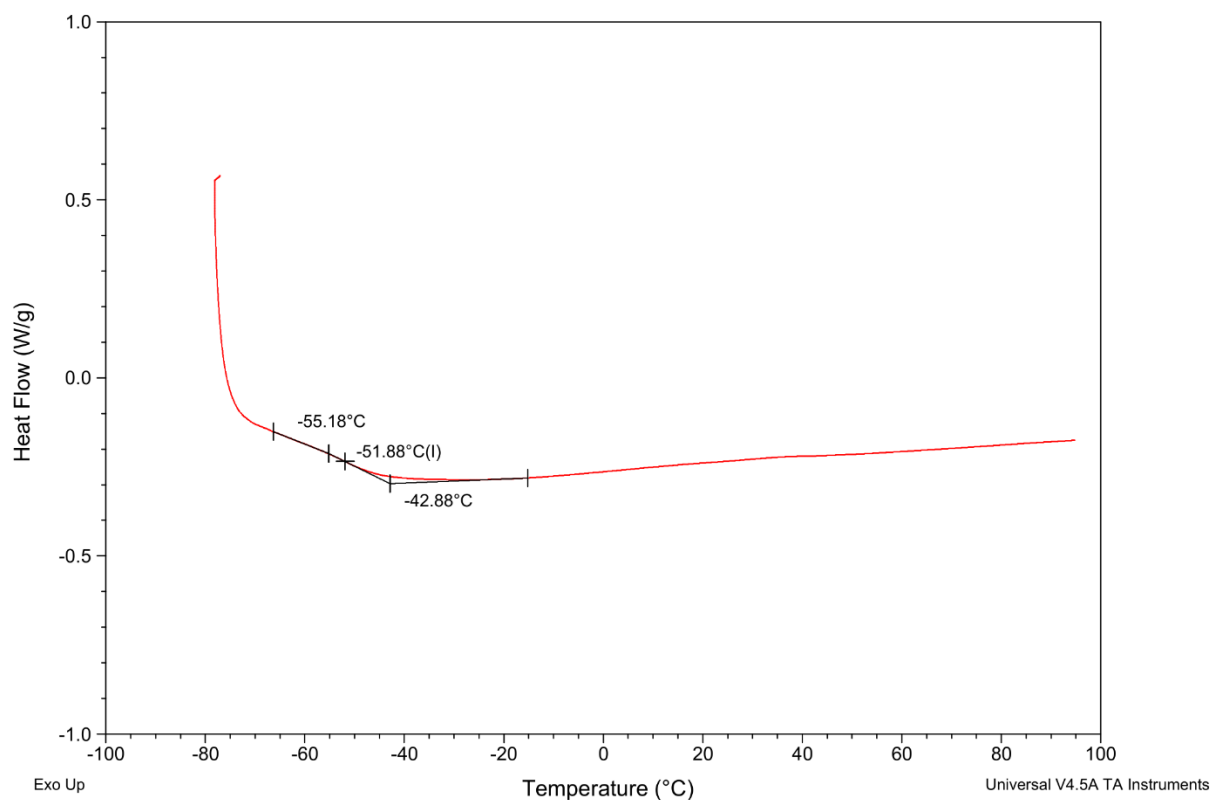

**Figure S16.** The DSC curve of TP-IBU patch.

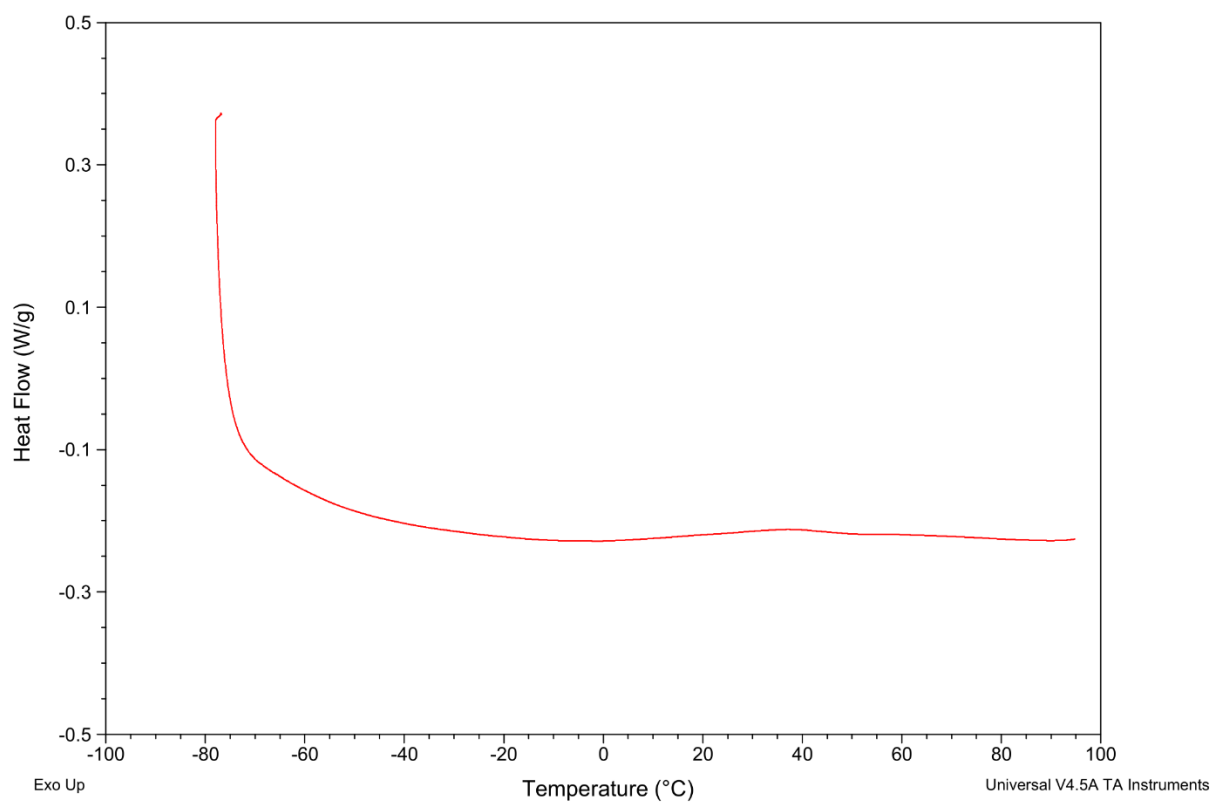

**Figure S17.** The DSC curve of TP-IBUNa patch.

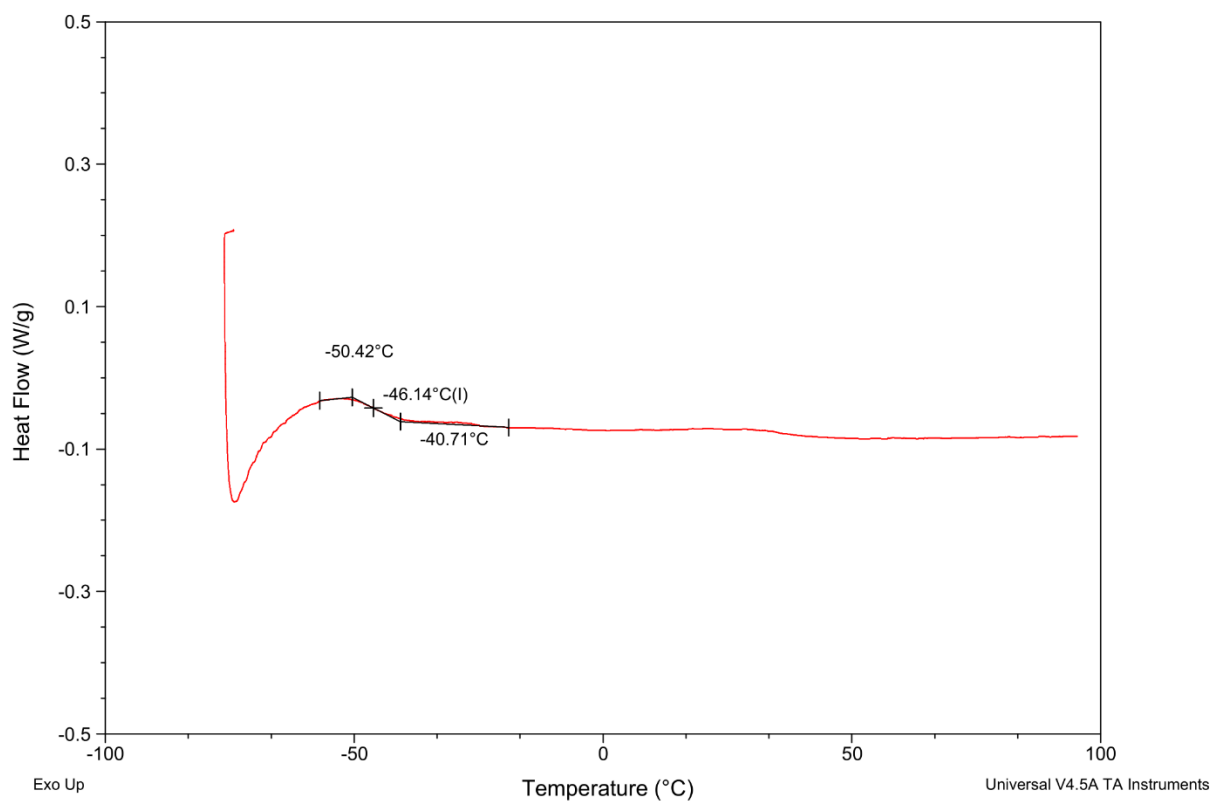

**Figure S18.** The DSC curve of TP-GlyIBU patch.

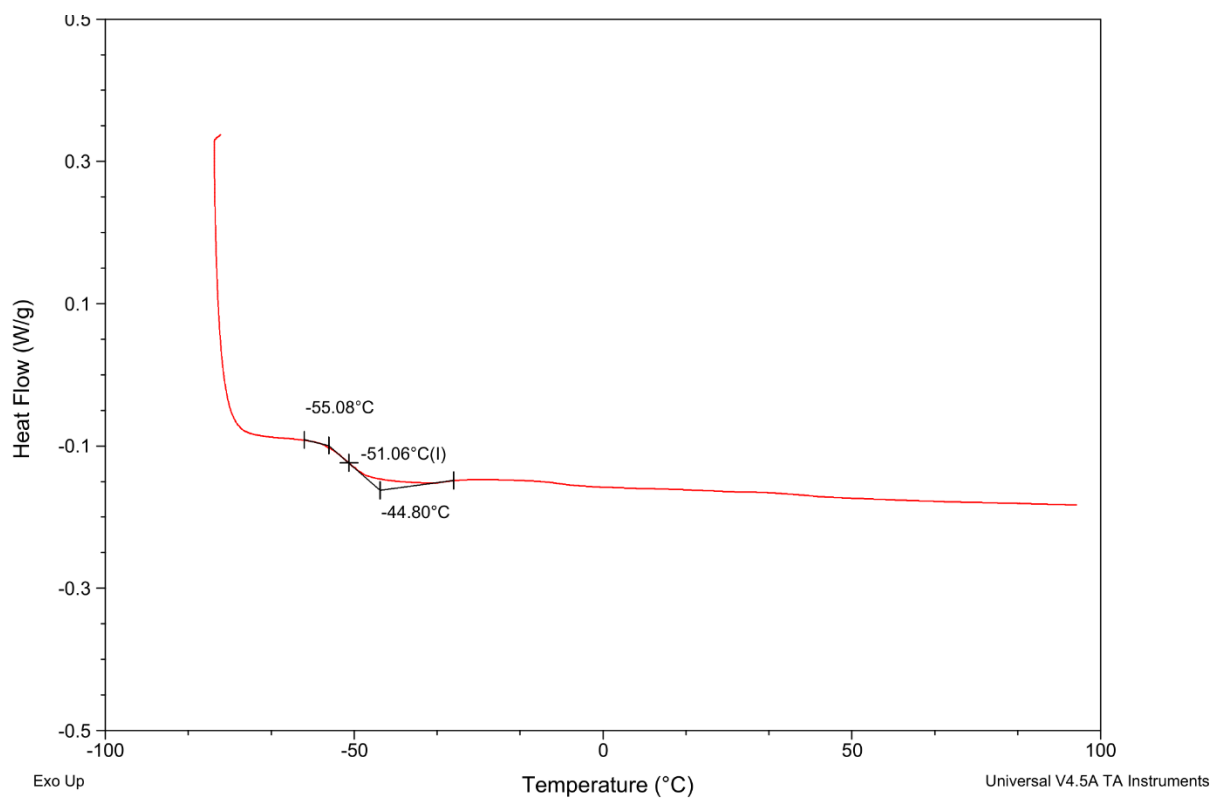

**Figure S19.** The DSC curve of TP-AlaIBU patch.



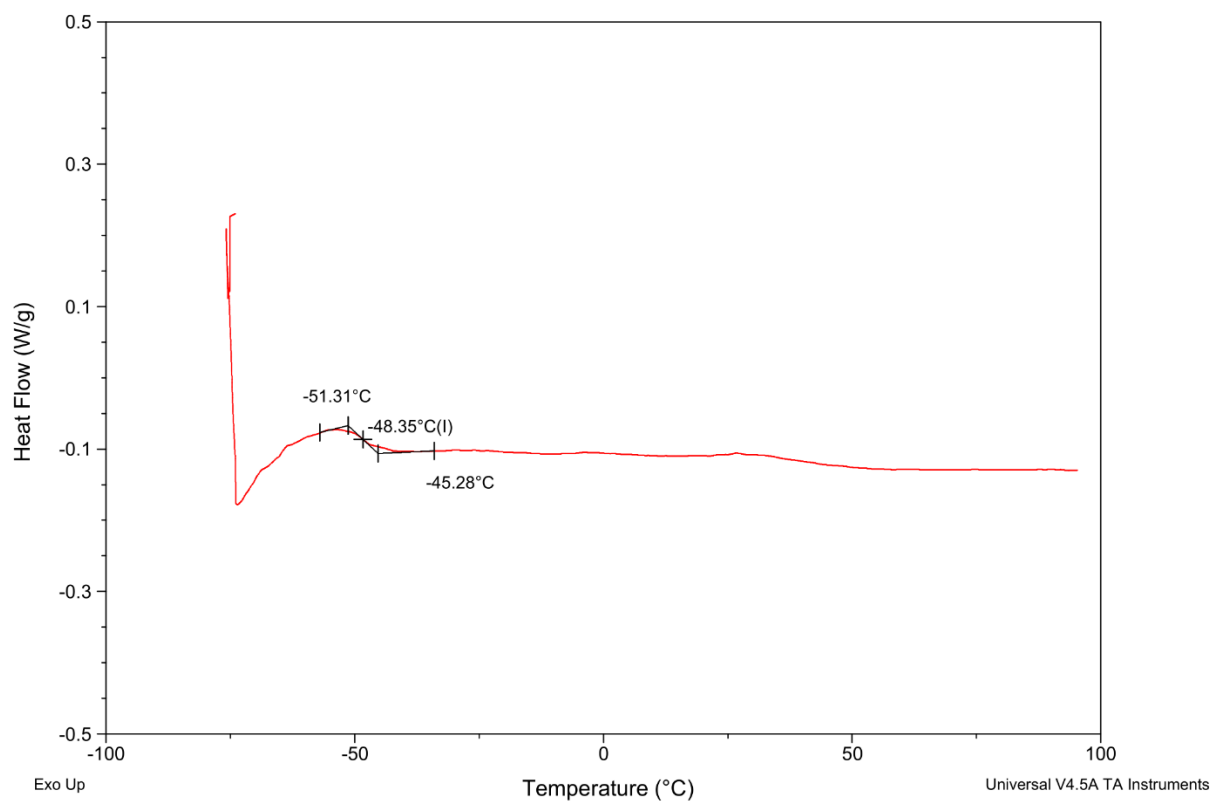

**Figure S20.** The DSC curve of TP-ValIBU patch.

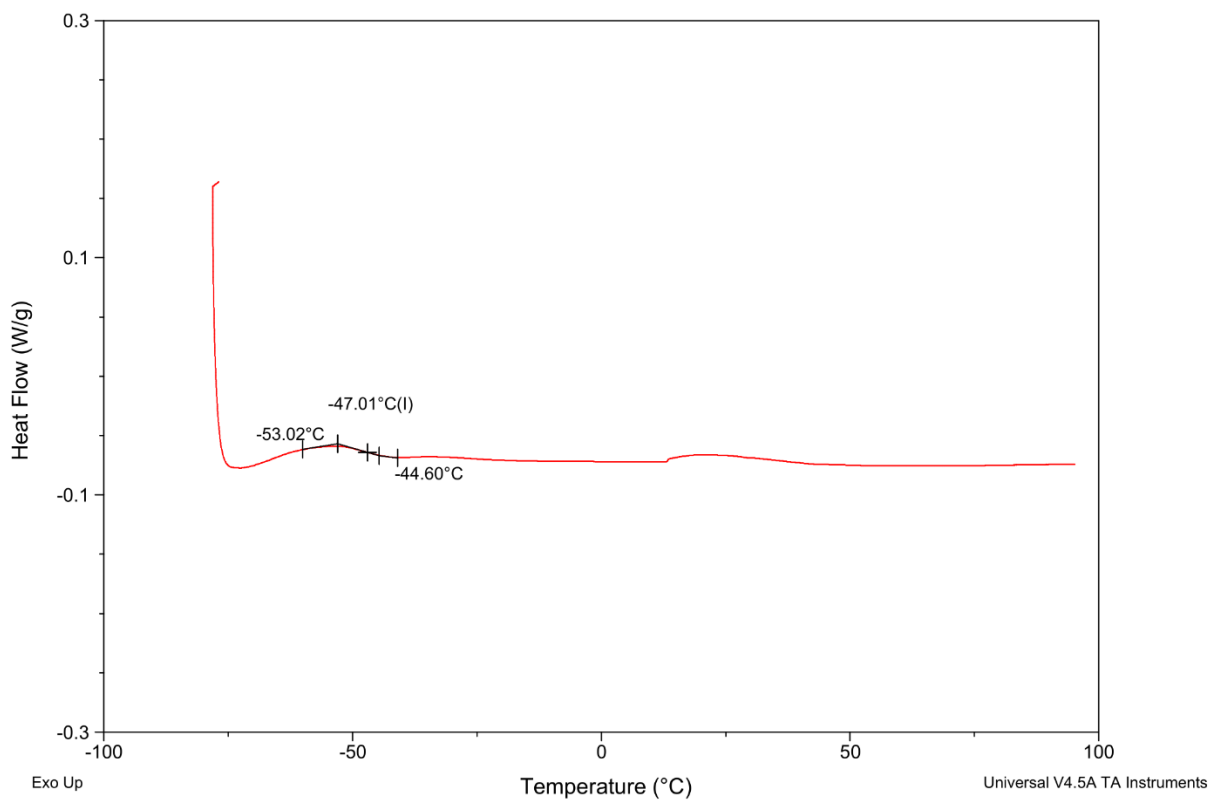

**Figure S21.** The DSC curve of TP-SerIBU patch.

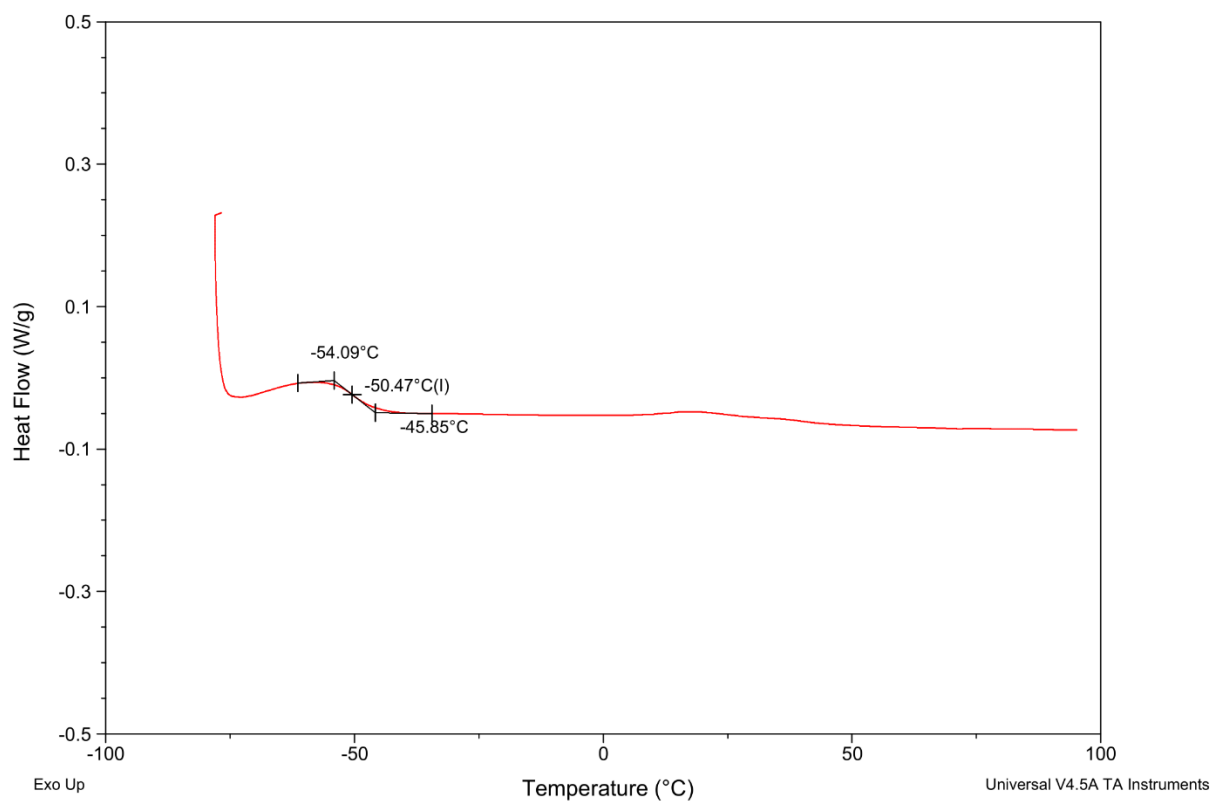

**Figure S22.** The DSC curve of TP-ThrIBU patch.

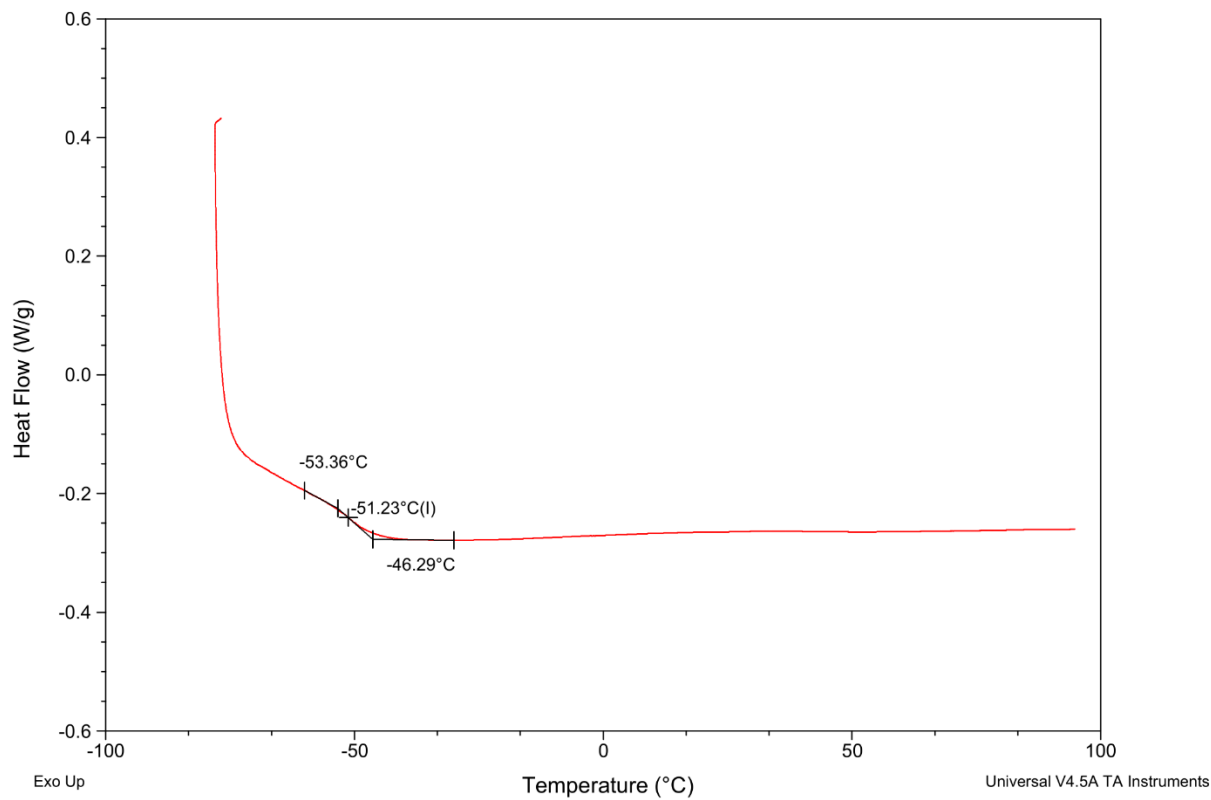

**Figure S23.** The DSC curve of TP-AspIBU patch.

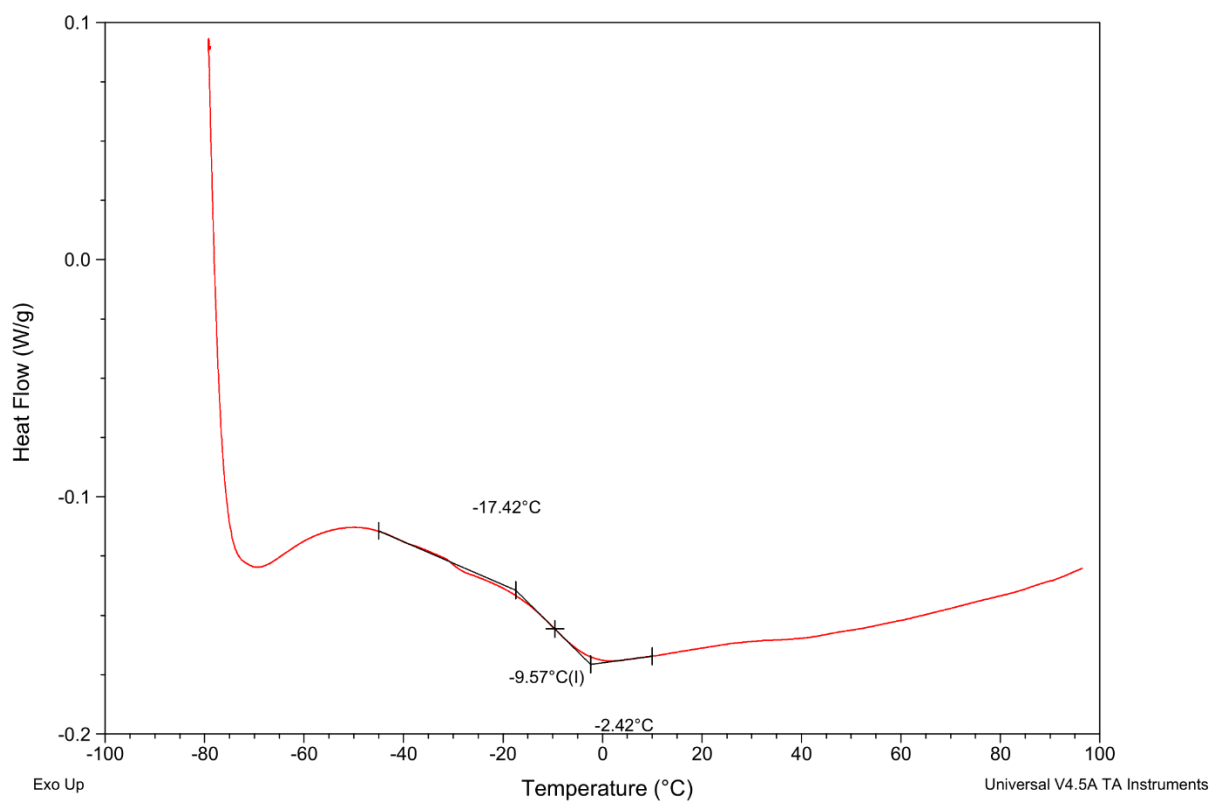

**Figure S24.** The DSC curve of TP-LysIBU patch.

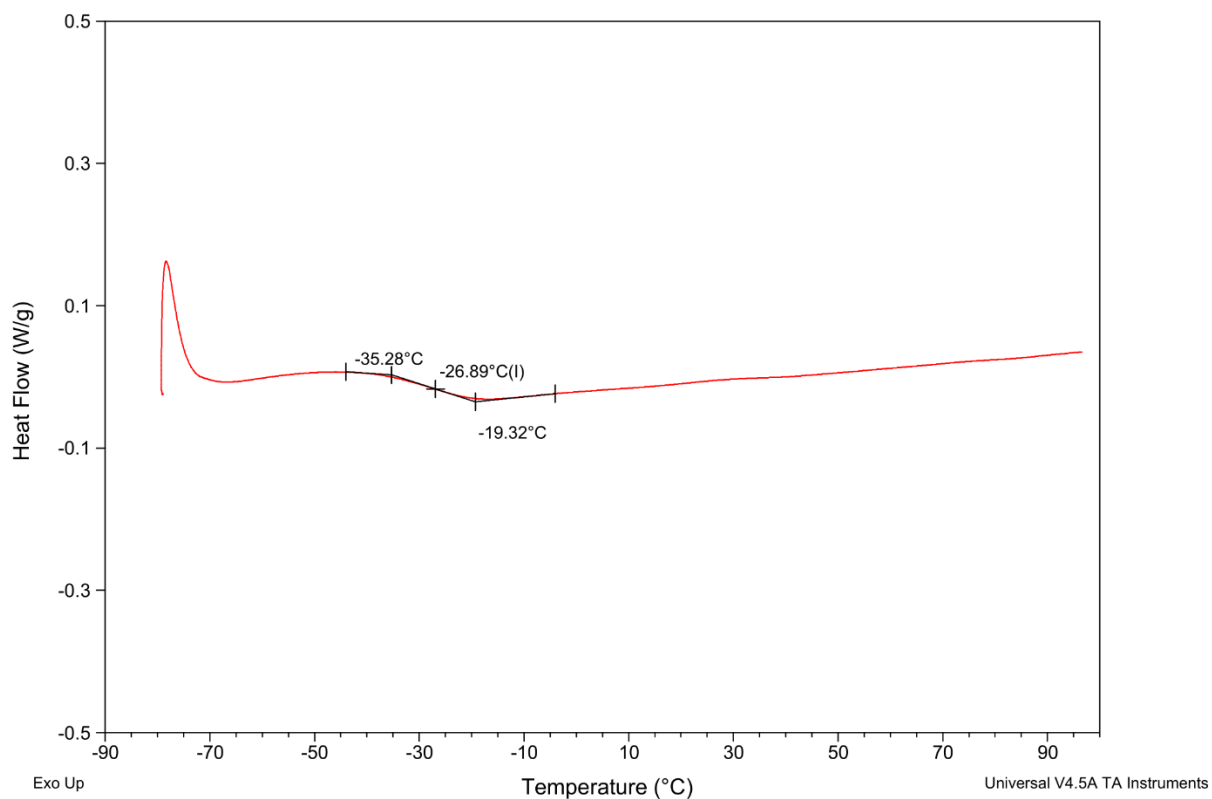

**Figure S25.** The DSC curve of TP-LysIBU<sub>2</sub> patch.

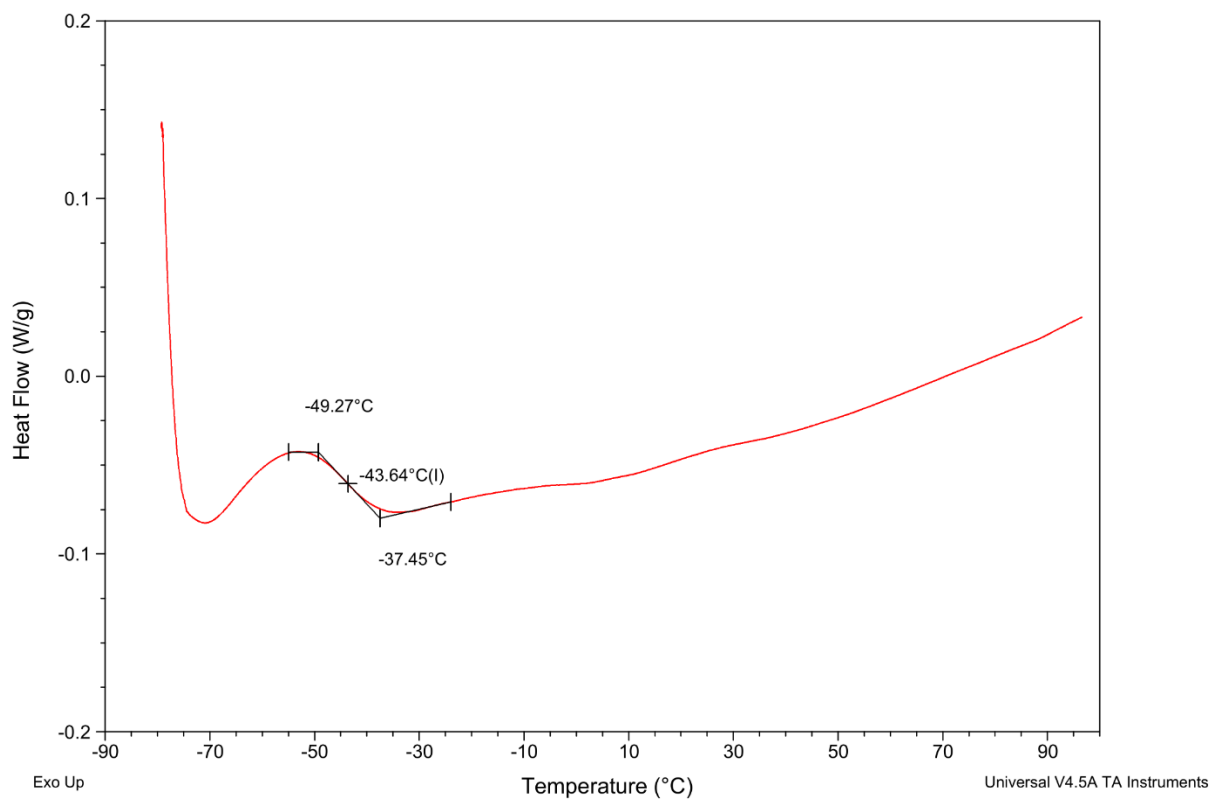

**Figure S26.** The DSC curve of TP-PheIBU patch.

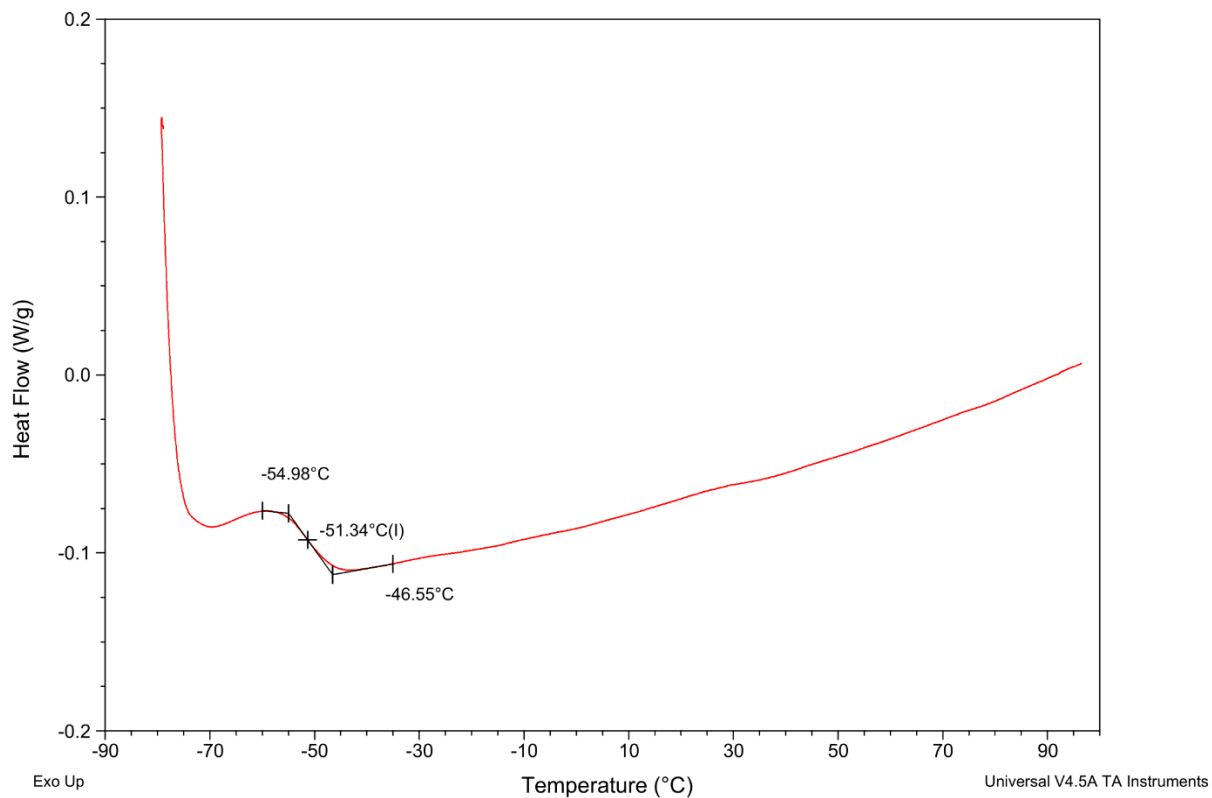

**Figure S27.** The DSC curve of TP-ProIBU patch.

**Table S1.** The Mann-Whitney's test estimated significant differences in the cumulative mass between all analyzed compounds, taking all time points during the entire 24 h permeation.

|                        | TP-IBUNa                | TP-GlyIBU                 | TP-AlaIBU                 | TP-ValIBU                 | TP-SerIBU                  | TP-ThrIBU                  | TP-AspIBU                 | TP-LysIBU                  | TP-LysIBU <sub>2</sub>     | TP-PheIBU                  | TP-ProIBU                 | CP                        |
|------------------------|-------------------------|---------------------------|---------------------------|---------------------------|----------------------------|----------------------------|---------------------------|----------------------------|----------------------------|----------------------------|---------------------------|---------------------------|
| TP-IBU                 | Z = 0.2787<br>p = 2.701 | Z = 0.1605<br>p = 0.1562  | Z = -0.7425<br>p = 0.6365 | Z = -1.1227<br>p = 0.2701 | Z = -1.9428<br>p = 0.0520  | Z = -1.9428<br>p = 0.0520  | Z = -0.8926<br>p = 0.3720 | Z = 1.8378<br>p = 0.0660   | Z = -2.3629<br>p = 0.0181* | Z = -1.7328<br>p = 0.0831  | Z = -0.6826<br>p = 0.4948 | Z = -0.2625<br>p = 0.7928 |
| TP-IBUNa               |                         | Z = -1.8378<br>p = 0.0660 | Z = -1.3127<br>p = 0.1892 | Z = -1.7328<br>p = 0.0831 | Z = -2.4679<br>p = 0.0135* | Z = -2.2579<br>p = 0.0239* | Z = -1.5228<br>p = 0.1278 | Z = -2.1529<br>p = 0.0278* | Z = -2.5730<br>p = 0.0100* | Z = -2.3629<br>p = 0.0181* | Z = -1.4177<br>p = 0.1562 | Z = -1.2077<br>p = 0.2271 |
| TP-GlyIBU              |                         |                           | Z = 0.3675<br>p = 0.7131  | Z = 0.1575<br>p = 0.8748  | Z = -1.1027<br>p = 0.2701  | Z = -1.1027<br>p = 0.2701  | Z = 0.4725<br>p = 0.6365  | Z = -1.2077<br>p = 0.2271  | Z = -1.7328<br>p = 0.0831  | Z = -0.5776<br>p = 0.5635  | Z = 0.6826<br>p = 0.4948  | Z = 1.1027<br>p = 0.2701  |
| TP-AlaIBU              |                         |                           |                           | Z = -1.1575<br>p = 0.8748 | Z = -1.4177<br>p = 0.1562  | Z = -1.3127<br>p = 0.1892  | Z = -0.8926<br>p = 0.3720 | Z = -1.3127<br>p = 0.1892  | Z = -1.7328<br>p = 0.0831  | Z = -1.1027<br>p = 0.2071  | Z = 0.1575<br>p = 0.8748  | Z = 0.4725<br>p = 0.6365  |
| TP-ValIBU              |                         |                           |                           |                           | Z = -1.3127<br>p = 0.1892  | Z = -1.2077<br>p = 0.2271  | Z = 0.3675<br>p = 0.7131  | Z = -1.3127<br>p = 0.1892  | Z = -1.6278<br>p = 0.1035  | Z = 0.8926<br>p = 0.3720   | Z = 0.5776<br>p = 0.5635  | Z = 0.9977<br>p = 0.3184  |
| TP-SerIBU              |                         |                           |                           |                           |                            | Z = 0.1575<br>p = 0.8748   | Z = 1.4177<br>p = 0.1562  | Z = 0.0525<br>p = 0.9581   | Z = 0.7876<br>p = 0.4308   | Z = 0.6826<br>p = 0.4948   | Z = 1.4177<br>p = 0.1562  | Z = 1.9428<br>p = 0.0520  |
| TP-ThrIBU              |                         |                           |                           |                           |                            |                            | Z = 1.1212<br>p = 0.1892  | Z = -0.1575<br>p = 0.8748  | Z = 0.9977<br>p = 0.3184   | Z = 0.4725<br>p = 0.6365   | Z = 1.3127<br>p = 0.1892  | Z = 1.8378<br>p = 0.0660  |
| TP-AspIBU              |                         |                           |                           |                           |                            |                            |                           | Z = -1.4177<br>p = 0.1562  | Z = -1.7328<br>p = 0.0831  | Z = -1.1027<br>p = 0.2071  | Z = -0.3675<br>p = 0.7131 | Z = 0.6826<br>p = 0.4948  |
| TP-LysIBU              |                         |                           |                           |                           |                            |                            |                           |                            | Z = -0.5776<br>p = 0.5635  | Z = 0.4725<br>p = 0.6365   | Z = 1.4117<br>p = 0.1562  | Z = 1.8378<br>p = 0.0660  |
| TP-LysIBU <sub>2</sub> |                         |                           |                           |                           |                            |                            |                           |                            |                            | Z = 1.2077<br>p = 0.2771   | Z = 1.9428<br>p = 0.0520  | Z = 2.2579<br>p = 0.0239* |
| TP-PheIBU              |                         |                           |                           |                           |                            |                            |                           |                            |                            |                            | Z = 1.2077<br>p = 0.2771  | Z = 1.7328<br>p = 0.0831  |
| TP-ProIBU              |                         |                           |                           |                           |                            |                            |                           |                            |                            |                            |                           | Z = 1.7328<br>p = 0.0831  |
